# Supplementary material for: Influence of phylogenetic structure and climate gradients on geographical variation in the morphology of Mexican flycatcher forests assemblages (Aves: Tyrannidae)
Source: PeerJ. 2019 Oct 15;7:e6754. doi: 10.7717/peerj.6754 (PMC6798907; doi:10.7717/peerj.6754)
Supplement: Table S3 [file peerj-07-6754-s003.docx]

| **Climatic index** | **Proportion of variance (%)** | **PC1 Loadings** |
| --- | --- | --- |
| Temperature variation index | 66.15 | | BIO1 = Annual Mean Temperature | 0.147 | | --- | --- | | BIO5 = Max Temperature of Warmest Month | -0.435 | | BIO6 = Min Temperature of Coldest Month | 0.21 | | BIO8 = Mean Temperature of Wettest Quarter | -0.394 | | BIO9 = Mean Temperature of Driest Quarter | 0.117 | | BIO10 = Mean Temperature of Warmest Quarter | -0.452 | | BIO11 = Mean Temperature of Coldest Quarter | 0.208 | |
| Temperature range index (temperature seasonality) | 78.94 | | BIO4 = Temperature Seasonality (standard deviation *100) | 0.29 | | --- | --- | | BIO7 = Temperature Annual Range (BIO5-BIO6) | 0.294 | | BIO2 = Mean Diurnal Range (Mean of monthly (max temp - min temp)) | 0.211 | | BIO3 = Isothermality (BIO2/BIO7) (* 100) | -0.234 | |
| Variation of precipitation in humid season | 76.16 | | BIO13 = Precipitation of Wettest Month | -0.27 | | --- | --- | | BIO16 = Precipitation of Wettest Quarter | -0.272 | | BIO12 = Annual Precipitation | -0.284 | | BIO18 = Precipitation of Warmest Quarter | -0.212 | |
| Variation of precipitation in the dry season | 67.69 | | BIO14 = Precipitation of Driest Month | -0.254 | | --- | --- | | BIO15 = Precipitation Seasonality (Coefficient of Variation) | 0.105 | | BIO17 = Precipitation of Driest Quarter | -2.52E-01 | | BIO19 = Precipitation of Coldest Quarter | -0.178 | |
